# Supplementary material
Source: Springer Nature journal article supplement (https://www.springermedizin.de/resource/supplementary/13033_2010_62_MOESM1_ESM.pdf/9651742)

■ Mental health as % of WHO programme budget 2006/07

■ Burden of disease from mental and neurological disorders 2004

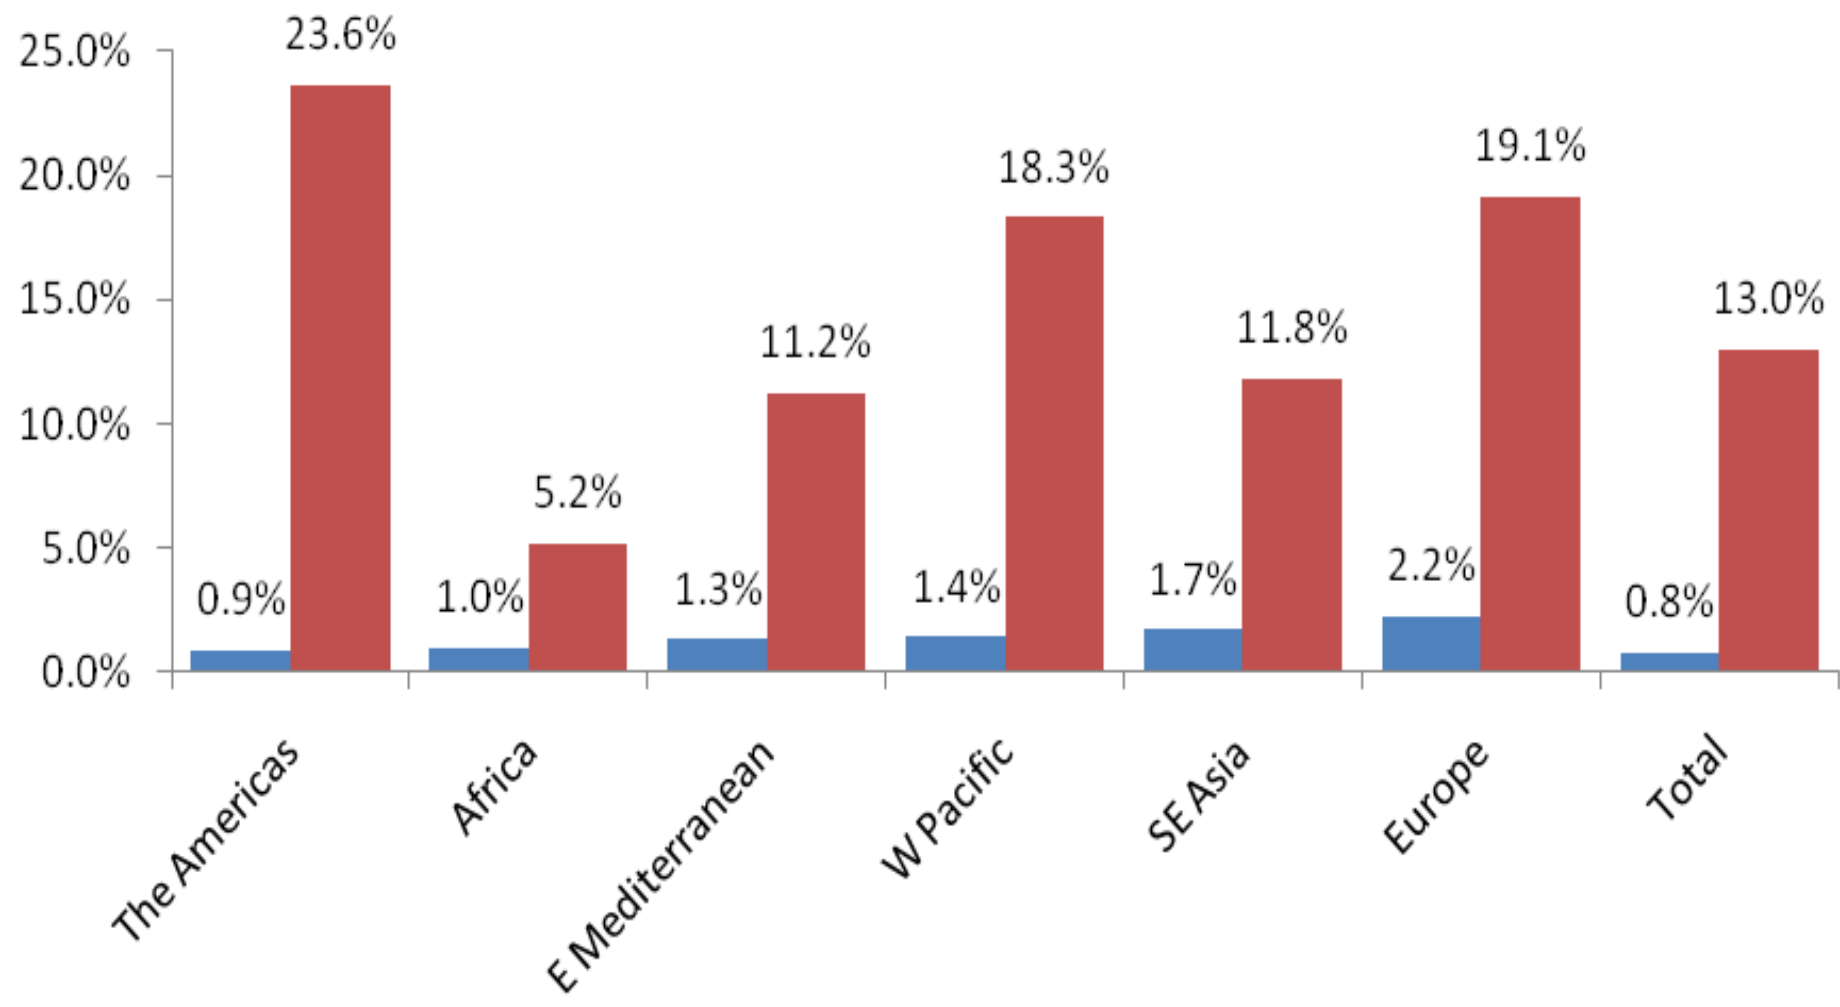

Supplement: MOESM1 [file 9651742]
